# Supplementary material
Source: PubMed Central journal article supplement (PMC6152611)
Supplement: ci6b00386_si_001.pdf [file ci6b00386_si_001.pdf]

# Applications of Systematic Molecular Scaffold Enumeration to Enrich SAR Information

*N. Yi Mok\* and Nathan Brown*

Cancer Research UK Cancer Therapeutics Unit, Division of Cancer Therapeutics, The Institute of Cancer Research, London, SM2 5NG, UK.

\* To whom correspondence should be addressed.

E-mail: [Yi.Mok@icr.ac.uk](mailto:Yi.Mok@icr.ac.uk)

**Table S1.** The list of 43 literature medicinal chemistry compound series containing a minimum of 100 compounds and their top Level 1 scaffolds used to exemplify the *EnCore* molecular scaffold enumeration approach. These publications were retrieved from the *Journal of Medicinal Chemistry* using the ChEMBL database.

| Year | Volume | First Page | PubMed ID | Protein Target                               | Number of Compounds in Publication | Top Level 1 Scaffold                      | Number of Unique Scaffolds after Two <i>EnCore</i> Generations |
|------|--------|------------|-----------|----------------------------------------------|------------------------------------|-------------------------------------------|----------------------------------------------------------------|
| 1980 | 23     | 830        | 7401110   | Thrombin                                     | 109                                | c1ccc2ccccc2c1                            | 13                                                             |
| 1986 | 29     | 2298       | 3783591   | Androgen receptor                            | 130                                | O=C1CCC2CCCCC2N1                          | 164                                                            |
| 1988 | 31     | 230        | 3121857   | Aldose reductase                             | 127                                | O=C1NC(=O)C2(CCOC=C2)N1                   | 130                                                            |
| 1988 | 31     | 2235       | 2848124   | Cholecystokinin receptor                     | 135                                | O=C1CN=Cc2ccccc2N1                        | 76                                                             |
| 1990 | 33     | 992        | 2308149   | Arachidonate 5-lipoxygenase                  | 110                                | c1ccc2ccccc2c1                            | 13                                                             |
| 1990 | 33     | 2240       | 2374150   | Adenosine A1 receptor                        | 103                                | C1Cn2cnnc2C=N1                            | 60                                                             |
| 1991 | 34     | 2231       | 1712395   | HIV-1 reverse transcriptase                  | 125                                | O=C1NC=CNc2ncccc12                        | 76                                                             |
| 1991 | 34     | 2248       | 2066997   | Voltage-gated calcium channel                | 100                                | C=C1C=NC=CC1c2ccccc2                      | 58                                                             |
| 1992 | 35     | 1650       | 1578493   | Platelet activating factor receptor          | 103                                | C(c1ccccc1)[n+]2ccsc2                     | 1                                                              |
| 1992 | 35     | 3919       | 1331449   | Oxytocin receptor                            | 100                                | C1CC2(CCN1)C=CC=C2                        | 47                                                             |
| 1992 | 35     | 4344       | 1360026   | Sigma receptor                               | 121                                | C(Oc1ccccc1)C2CCNCC2                      | 114                                                            |
| 1993 | 36     | 4276       | 8277510   | Cholecystokinin B receptor                   | 121                                | O=C1CN=Cc2ccccc2N1                        | 76                                                             |
| 1993 | 36     | 3993       | 8258821   | Oxytocin receptor                            | 159                                | C1CC2(CCN1)CCC=C2                         | 84                                                             |
| 1993 | 36     | 2279       | 8360872   | Thymidylate synthase                         | 102                                | C1Cc2cnnc2C=C1                            | 54                                                             |
| 1994 | 37     | 2808       | 8064808   | Angiotensin II receptor                      | 101                                | O=C1NN=CN1Cc2ccccc2                       | 79                                                             |
| 1995 | 38     | 2748       | 7629813   | Potassium-transporting ATPase                | 125                                | c1ccc2ncccc2c1                            | 23                                                             |
| 1996 | 39     | 1243       | 8632431   | Acyl coenzyme A: cholesterol acyltransferase | 167                                | O=C(NS(=O)(=O)Oc1ccccc1)Oc2ccccc2         | 141                                                            |
| 1997 | 40     | 1347       | 9135032   | Cyclooxygenase-2                             | 109                                | c1ccc(cc1)c2cc[nH]2                       | 71                                                             |
| 1997 | 40     | 1955       | 9207936   | Arachidonate 5-lipoxygenase                  | 127                                | c1ccc2sccc2c1                             | 22                                                             |
| 1997 | 40     | 2017       | 9207943   | Sodium/hydrogen exchanger                    | 113                                | C1CCN(CC1)c2ccccc2                        | 66                                                             |
| 1998 | 41     | 877        | 9526562   | Protein farnesyltransferase                  | 157                                | C1Cc2cccnc2CC=C1                          | 76                                                             |
| 2000 | 43     | 4288       | 11063624  | Neuropeptide Y receptor                      | 100                                | c1ncc2[nH]ccc2n1                          | 97                                                             |
| 2000 | 43     | 4135       | 11063610  | Phosphoglycerate kinase                      | 200                                | c1ncc2nc[nH]c2n1                          | 100                                                            |
| 2000 | 43     | 1293       | 10753467  | Protein tyrosine phosphatase 1B              | 116                                | o1ccc2ccccc12                             | 37                                                             |
| 2001 | 44     | 1777       | 11356112  | Protein tyrosine phosphatase CD45            | 100                                | O=C1C=Cc2ccccc2C1=O                       | 36                                                             |
| 2002 | 45     | 3794       | 12166951  | C-C chemokine receptor 3                     | 109                                | C(C1CCNCC1)c2ccccc2                       | 88                                                             |
| 2002 | 45     | 5260       | 12431053  | Monoamine oxidase A                          | 118                                | C1Cc2ccccc2C1                             | 30                                                             |
| 2004 | 47     | 2776       | 15139756  | Endothelin receptor                          | 104                                | O=C1CNCc2ccccc2N1                         | 101                                                            |
| 2004 | 47     | 5021       | 15456246  | Estrogen receptor                            | 108                                | o1cnc2ccccc12                             | 46                                                             |
| 2004 | 47     | 5894       | 15537345  | Cyclin-dependent kinase                      | 100                                | O=C1NC=Nc2[nH]ncc12                       | 90                                                             |
| 2005 | 48     | 7781       | 16302817  | Dynamin-1                                    | 133                                | O=C(NCCCNC(=O)\C=C\c1ccccc1)\C=C\c2ccccc2 | 157                                                            |

| Year | Volume | First Page | PubMed ID | Protein Target                                | Number of Compounds in Publication | Top Level 1 Scaffold        | Number of Unique Scaffolds after Two <i>EnCore</i> Generations |
|------|--------|------------|-----------|-----------------------------------------------|------------------------------------|-----------------------------|----------------------------------------------------------------|
| 2005 | 48     | 7829       | 16302822  | DNA-dependent protein kinase                  | 138                                | O=C1C=COc2ccccc12           | 54                                                             |
| 2006 | 49     | 5093       | 16913699  | Dopamine D4 receptor                          | 106                                | C1CN(CCN1)c2ccccc2          | 83                                                             |
| 2006 | 49     | 4896       | 16884302  | Checkpoint kinase Chk1                        | 103                                | C1Cc2ccccc2N1               | 46                                                             |
| 2006 | 49     | 3832       | 16789740  | Methionine aminopeptidase 2                   | 109                                | C1CCc2ccccc2C1              | 41                                                             |
| 2006 | 49     | 971        | 16451063  | RNA-dependent RNA polymerase                  | 113                                | O=S1(=O)N=CNc2ccccc12       | 57                                                             |
| 2009 | 52     | 3892       | 19469546  | Thyroid hormone receptor                      | 147                                | O=C(CCN1CCNCC1)c2ccccc2     | 144                                                            |
| 2011 | 54     | 6305       | 21823597  | Serotonin 2a (5-HT2a) receptor                | 112                                | O=C(NCCCN1CCNCC1)c2c[nH]cn2 | 356                                                            |
| 2012 | 55     | 1021       | 22224594  | Transglutaminase 2                            | 106                                | O=S(=O)(N1CCNCC1)c2ccccc2   | 91                                                             |
| 2012 | 55     | 2311       | 22263837  | Aldo-keto reductase                           | 111                                | N(c1ccccc1)c2ccccc2         | 24                                                             |
| 2012 | 55     | 2945       | 22364528  | Hypoxia-inducible factor prolyl hydroxylase 1 | 100                                | O=C1NC(=O)C2(CCNCC2)N1      | 109                                                            |
| 2013 | 56     | 437        | 23245311  | Valosine containing protein                   | 112                                | c1cncc(c1)n2cnnc2           | 40                                                             |
| 2014 | 57     | 3939       | 24742150  | CDK9/cyclin T1                                | 101                                | N(c1ccccc1)c2ccnnc2         | 54                                                             |

**Table S2.** The list of 93 *Journal of Medicinal Chemistry* publications retrieved from the ChEMBL database that were analyzed in the literature COX-2 inhibitor case study.

| Year | Volume | First Page | PubMed ID |
|------|--------|------------|-----------|
| 1994 | 37     | 3878       | 7966148   |
| 1995 | 38     | 3895       | 7562922   |
| 1995 | 38     | 4570       | 7473585   |
| 1995 | 38     | 4897       | 8523403   |
| 1996 | 39     | 253        | 8568815   |
| 1996 | 39     | 1846       | 8627608   |
| 1997 | 40     | 819        | 9057869   |
| 1997 | 40     | 980        | 9083488   |
| 1997 | 40     | 1347       | 9135032   |
| 1997 | 40     | 1619       | 9171872   |
| 1997 | 40     | 1634       | 9171873   |
| 1998 | 41     | 420        | 9484493   |
| 1998 | 41     | 1112       | 9544211   |
| 1998 | 41     | 1124       | 9544212   |
| 1998 | 41     | 3515       | 9719605   |
| 1998 | 41     | 4800       | 9822550   |
| 1999 | 42     | 1151       | 10197959  |
| 1999 | 42     | 1161       | 10197960  |
| 1999 | 42     | 1274       | 10197970  |
| 2000 | 43     | 214        | 10649977  |
| 2000 | 43     | 775        | 10715145  |
| 2000 | 43     | 1661       | 10794682  |
| 2000 | 43     | 2280       | 10841807  |
| 2000 | 43     | 2860       | 10956194  |
| 2000 | 43     | 3168       | 10956225  |
| 2000 | 43     | 4582       | 11101350  |
| 2001 | 44     | 350        | 11462976  |
| 2001 | 44     | 641        | 11262075  |
| 2001 | 44     | 2921       | 11520200  |
| 2001 | 44     | 3039       | 11520213  |
| 2001 | 44     | 3223       | 11563921  |
| 2002 | 45     | 1402       | 11906281  |
| 2002 | 45     | 1511       | 11906292  |

| Year | Volume | First Page | PubMed ID |
|------|--------|------------|-----------|
| 2002 | 45     | 4816       | 12383007  |
| 2002 | 45     | 4847       | 12383010  |
| 2002 | 45     | 5182       | 12408728  |
| 2003 | 46     | 3463       | 12877584  |
| 2003 | 46     | 3975       | 12954051  |
| 2003 | 46     | 4872       | 14584938  |
| 2003 | 46     | 5484       | 14640557  |
| 2004 | 47     | 792        | 14761182  |
| 2004 | 47     | 2180       | 15084117  |
| 2004 | 47     | 3874       | 15239665  |
| 2004 | 47     | 3972       | 15267236  |
| 2004 | 47     | 4881       | 15369392  |
| 2004 | 47     | 6108       | 15537365  |
| 2004 | 47     | 6195       | 15566290  |
| 2004 | 47     | 6749       | 15615524  |
| 2005 | 48     | 3428       | 15857149  |
| 2005 | 48     | 3613       | 15887968  |
| 2005 | 48     | 3930       | 15916445  |
| 2005 | 48     | 4061       | 15943479  |
| 2005 | 48     | 5705       | 16134939  |
| 2005 | 48     | 6516       | 16190777  |
| 2005 | 48     | 6523       | 16220969  |
| 2005 | 48     | 6997       | 16250658  |
| 2006 | 49     | 1668       | 16509583  |
| 2007 | 50     | 1425       | 17341061  |
| 2007 | 50     | 1449       | 17335184  |
| 2007 | 50     | 5403       | 17915854  |
| 2007 | 50     | 6367       | 17994684  |
| 2008 | 51     | 142        | 18072726  |
| 2008 | 51     | 1601       | 18311898  |
| 2008 | 51     | 2400       | 18363350  |
| 2008 | 51     | 4150       | 18588282  |
| 2008 | 51     | 4476       | 18598017  |

| Year | Volume | First Page | PubMed ID |
|------|--------|------------|-----------|
| 2008 | 51     | 7800       | 19053765  |
| 2009 | 52     | 1525       | 19296694  |
| 2009 | 52     | 5864       | 19791801  |
| 2010 | 53     | 723        | 19957931  |
| 2010 | 53     | 3707       | 20387815  |
| 2010 | 53     | 4691       | 20503989  |
| 2010 | 53     | 5033       | 20527891  |
| 2010 | 53     | 6560       | 20804197  |
| 2010 | 53     | 7879       | 20954731  |
| 2011 | 54     | 1356       | 21280601  |
| 2011 | 54     | 2060       | 21381754  |
| 2011 | 54     | 2529       | 21413808  |
| 2011 | 54     | 3037       | 21434686  |
| 2011 | 54     | 3650       | 21542630  |
| 2011 | 54     | 7759       | 21992176  |
| 2011 | 54     | 8555       | 22091869  |
| 2012 | 55     | 688        | 22148253  |
| 2012 | 55     | 2287       | 22263894  |
| 2012 | 55     | 2311       | 22263837  |
| 2012 | 55     | 2932       | 22236250  |
| 2012 | 55     | 5143       | 22404396  |
| 2012 | 55     | 8152       | 22916727  |
| 2012 | 55     | 8807       | 23043222  |
| 2013 | 56     | 2429       | 23432095  |
| 2013 | 56     | 3191       | 23534442  |
| 2013 | 56     | 4277       | 23651359  |
| 2014 | 57     | 5638       | 24920381  |
